# Supplementary material for: The Streamlined Genome of Phytomonas spp. Relative to Human Pathogenic Kinetoplastids Reveals a Parasite Tailored for Plants
Source: PLoS Genet. 2014 Feb 6;10(2):e1004007. doi: 10.1371/journal.pgen.1004007 (PMC3916237; doi:10.1371/journal.pgen.1004007)
Supplement: Table S4 — Horizontal gene transfer candidates specific of Phytomonas EM1 and HART1. T. brucei (Tb); T. cruzi (Tc), L. major (Lm). *, described in [52]. (XLS) [file pgen.1004007.s027.xls]

## Sheet: Feuil1
gene in EM1	gene in HART1	ortholog in Lm	ortholog in Tb	ortholog in Tc	Putative function (inferred from uniprot hits)
GSEM1T00001506001	GSHART1T00007610001	none	none	none	contains Carbohydrate/purine kinase domain PfkB
GSEM1T00002366001	GSHART1T00007404001	none	none	none	alpha,alpha-trehalose phosphorylase
GSEM1T00002373001	GSHART1T00007395001	none	none	none	Aldehyde dehydrogenase
GSEM1T00002402001	GSHART1T00007368001	none	none	none	Ferrochelatase
GSEM1T00004407001	GSHART1T00001715001, GSHART1T00001946001, GSHART1T00003794001, GSHART1T00003795001, GSHART1T00003933001, GSHART1T00004014001, GSHART1T00004441001, GSHART1T00004955001, GSHART1T00004968001, GSHART1T00005867001, GSHART1T00006973001	none	none	none	metallocarboxypeptidase
GSEM1T00006475001	GSHART1T00004766001	none	none	none	Alcohol dehydrogenase, iron-type
Hit on scaffold_2:695081-695167, not in synteny (region containing gaps: gene not completely assembled)	GSHART1T00000575001	none	none	none	Alcohol dehydrogenase, zinc-binding
GSEM1T00007158001	GSHART1T00002772001	none	none	none	Hydrolase alpha/beta fold
HGT also found in Leishmania (+ T. cruzi in some cases)
gene in EM1	gene in HART1	ortholog in Lm	ortholog in Tb	ortholog in Tc	Putative function (inferred from uniprot hits)
GSEM1T00000032001	GSHART1T00003553001	LmjF29.0250	Tbg.972.2.4310, Tbg.972.2.4340	Tc00.1047053510141.10	Iron/ascorbate oxidoreductase
GSEM1T00000109001	Hit in synteny on scaffold_2:1779874-1780035 (gene missed in the annotation)	LmjF29.0867	Tbg972.5.6150	Tc00.1047053504431.100	Guanine deaminase
GSEM1T00000125001	GSHART1T00003471001	LmjF29.0940	Tbg972.3.5530	Tc00.1047053504143.10	contains « Sulphatase-modifying factor » domain
GSEM1T00000211001, GSEM1T00006757001, GSEM1T00006226001	GSHART1T00003387001, GSHART1T00003694001	LmjF29.1830	Tbg972.11.18870	Tc00.1047053507089.270	Dihydrolipoamide dehydrogenase
GSEM1T00000350001	GSHART1T00003259001	LmjF20.0320	Tbg972.1.410	Tc00.1047053511421.160	contains Leucine-rich repeat domain
GSEM1T00000625001	GSHART1T00002989001	LmjF36.1660	Tbg972.10.7460	Tc00.1047053507639.50	Pseudouridine synthase
GSEM1T00000757001	GSHART1T00002868001	LmjF36.2750	none	none	N-acetyltransferase
GSEM1T00000836001	GSHART1T00008163001	LmjF32.0420	Tbg972.10.17720	Tc00.1047053506213.90	contains MORN motif and Kinesin, motor domain
GSEM1T00000841001	GSHART1T00008167001	LmjF31.2150	Tbg972.11.5340	Tc00.1047053506213.50	Aldo/keto reductase
GSEM1T00001109001	Hit in synteny on scaffold_8:745092-745424 (region containing gaps: gene not completely assembled)	LmjF02.0030*	none	none	tagatose-6-phosphate kinase
GSEM1T00001226001	GSHART1T00007863001	LmjF21.0845	Tbg972.10.1590	Tc00.1047053506457.30	Phosphoribosyltransferase
GSEM1T00001395001	GSHART1T00000378001	LmjF33.0960	Tbg972.10.13960	none	Nicotinate phosphoribosyltransferase
GSEM1T00001473001	GSHART1T00000451001	LmjF33.1680	none	none	Pyridoxal phosphate-dependent transferase
GSEM1T00001587001	GSHART1T00007522001	LmjF36.6310*	none	none	Homocysteine S-methyltransferase
GSEM1T00001621001	GSHART1T00007488001	LmjF36.5960	none	none	Glycerophosphoryl diester phosphodiesterase
GSEM1T00001865001	GSHART1T00001158001	LmjF25.0130	Tbg972.11.60	none	Translation elongation factor GTP-binding
GSEM1T00001892001	GSHART1T00005163001	LmjF11.0560	Tbg972.11.7570	Tc00.1047053506773.70	Transcription accessory protein , Tex-like protein
GSEM1T00001935001	GSHART1T00005212001	LmjF11.1000	Tbg972.11.7080	Tc00.1047053510101.140	Pyruvate, phosphate dikinase
GSEM1T00001971001, GSEM1T00001973001, GSEM1T00001974001, GSEM1T00001976001, GSEM1T00001982001	GSHART1T00005244001, GSHART1T00005246001, GSHART1T00005247001, GSHART1T00005248001, GSHART1T00005249001	LmjF10.1230	none	none	Protein of unknown function DUF1861
GSEM1T00002133001	GSHART1T00008110001	LmjF27.1830	Tbg.972.2.2370	Tc00.1047053509099.10	GTP binding protein
GSEM1T00002141001	GSHART1T00006520001	LmjF26.1550,LmjF33.2600,LmjF36.1140	Tbg.972.2.2280	Tc00.1047053507547.40	3-hydroxyacyl-CoA dehydrogenase
GSEM1T00002235001	GSHART1T00005056001	LmjF23.0200	none	none	Endoribonuclease L-PSP
GSEM1T00002260001	GSHART1T00005080001	LmjF23.0430	none	Tc00.1047053504425.90	Aldose 1-epimerase
GSEM1T00002347001	GSHART1T00002506001	LmjF21.0125	Tbg972.10.2290	Tc00.1047053506493.80	DNA topoisomerase IA
GSEM1T00002485001, GSEM1T00005830001	GSHART1T00007276001	LmjF31.1890, LmjF31.2020	Tbg972.10.14780	Tc00.1047053510257.80	Peptidase m20/m25/m40 family
GSEM1T00002510001	GSHART1T00001086001	LmjF17.0725*	Tbg972.10.19740, Tbg972.5.2930	Tc00.1047053506519.130	Inosine-5'-monophosphate dehydrogenase IMPdh
GSEM1T00002560001	GSHART1T00007036001	LmjF17.0360	Tbg972.9.1500	Tc00.1047053510053.60	Cytidine deaminase
GSEM1T00002704001	GSHART1T00005357001	LmjF08.1130	Tbg972.5.4160	Tc00.1047053503777.19	Phosphoribosylpyrophosphate synthetase
GSEM1T00002827001	GSHART1T00004324001	LmjF32.2870	none	Tc00.1047053509073.70	Phosphatidate cytidylyltransferase
GSEM1T00002880001	GSHART1T00004274001	LmjF22.1420	none	Tc00.1047053504159.40	Aquaporin, major intrinsic protein
GSEM1T00003334001	GSHART1T00000667001	LmjF34.3850	none	none	Aquaporin 9, major intrinsic protein
GSEM1T00003469001	GSHART1T00007778001	LmjF13.1390	none	none	phosphatidylethanolamine-hydrolyzing phospholipase D
GSEM1T00003492001	GSHART1T00007751001	LmjF26.0270	Tbg972.7.1650	Tc00.1047053508207.200	GTP-binding protein
GSEM1T00003537001	GSHART1T00007703001	LmjF26.0830	Tbg972.7.1080	Tc00.1047053503899.90	Asparagine synthetase (Aspartate--ammonia ligase)
GSEM1T00003582001	GSHART1T00001798001	LmjF30.2090	none	Tc00.1047053506357.50	Alcohol dehydrogenase, iron-type
GSEM1T00003624001	GSHART1T00001762001	LmjF01.0480	none	none	Threonine aldolase
GSEM1T00003631001	GSHART1T00001757001	LmjF01.0450	Tbg972.9.2100	Tc00.1047053506829.80	Alpha/beta-hydrolase ( Pyrazinamidase/nicotinamidase, Isochorismatase)
GSEM1T00003729001	GSHART1T00004485001	LmjF14.1190	Tbg972.7.4200	Tc00.1047053506795.44	Carbohydrate kinase
GSEM1T00003903001	GSHART1T00006079001	LmjF35.5110	Tbg972.3.2080	none	Pseudouridine synthase
GSEM1T00003920001	GSHART1T00006095001	LmjF35.5330*	Tbg972.9.4980	Tc00.1047053408799.19	Isopentenyl-diphosphate delta-isomerase
GSEM1T00004030001	GSHART1T00000583001	LmjF20.1550	Tbg972.1.1810	Tc00.1047053506363.70	peptidase
GSEM1T00004089001	GSHART1T00003817001	LmjF07.0430	Tbg972.8.990	none	MaoC-like dehydratase
GSEM1T00004256001	GSHART1T00002440001	LmjF16.0950	none	none	Sucrose-phosphate synthase-like
GSEM1T00004309001	GSHART1T00002042001	LmjF19.0220	none	Tc00.1047053506211.150	Polyprenyl synthetase
GSEM1T00004574001	GSHART1T00001573001	LmjF13.0020	Tbg972.7.6850		Cis-prenyltransferase
GSEM1T00004596001	GSHART1T00001589001	LmjF06.1070*	Tbg972.7.6600	Tc00.1047053507559.80	Deoxyribose-phosphate aldolase
GSEM1T00004649001	GSHART1T00001647001	LmjF06.0560*	Tbg972.7.5940	Tc00.1047053509151.130	Deoxyuridine triphosphatase dUTPase
GSEM1T00004657001	GSHART1T00001655001	LmjF06.0460*	Tbg972.7.5850	Tc00.1047053509151.40	ATP-NAD kinase
GSEM1T00004815001	GSHART1T00005790001	LmjF35.0350	Tbg972.10.5010	Tc00.1047053510997.30	putative uncharacterized protein
GSEM1T00004950001	GSHART1T00002646001	LmjF35.1220	none	Tc00.1047053508805.80	Short-chain dehydrogenase
GSEM1T00005012001	GSHART1T00006868001	LmjF18.1580	none	none	Inosine-uridine preferring nucleoside hydrolase
GSEM1T00005590001	GSHART1T00006206001	LmjF05.0830	Tbg972.7.8280	Tc00.1047053508387.20	Methylthioadenosine phosphorylase
GSEM1T00005759001	GSHART1T00005914001	LmjF03.0710	none	Tc00.1047053506691.40	contains YbaK/aminoacyl-tRNA synthetase-associated domain
GSEM1T00005949001	GSHART1T00001911001	LmjF31.2950	none	none	NUDIX hydrolase
GSEM1T00006082001	GSHART1T00005127001	LmjF35.1030	none	none	contains RmlC-like jelly roll fold, Protein of unknown function DUF985 domain
GSEM1T00006389001	GSHART1T00004843001	LmjF30.2990	Tbg972.6.4130	Tc00.1047053506943.80	Protein of unknown function DUF2817
GSEM1T00006672001	GSHART1T00004569001	LmjF30.0180	Tbg972.6.1240	Tc00.1047053505807.180	2-hydroxy-3-oxopropionate reductase
GSEM1T00006747001	Hit in synteny on scaffold_21:22955-23374 (gene missed in the annotation)	LmjF31.2490	none	none	Adrenodoxin-like protein (Ferredoxin, 2fe-2s-like protein)
GSEM1T00006855001	GSHART1T00002142001	LmjF31.1140	Tbg972.4.4450	none	Monoglyceride lipase
GSEM1T00006931001	GSHART1T00006462001	LmjF36.3230	Tbg972.11.10730	Tc00.1047053511589.170	Glucose-methanol-choline oxidoreductase
GSEM1T00007028001	GSHART1T00003730001	LmjF31.3050	none	none	cyclase
GSEM1T00007083001	GSHART1T00002693001	LmjF13.0080	Tbg972.11.3630	Tc00.1047053506227.80	Mitochondrial DNA polymerase I
GSEM1T00007088001	GSHART1T00002698001	LmjF13.1680	Tbg972.7.2720	Tc00.1047053506857.20	Pyrroline-5-carboxylate reductase
GSEM1T00007191001	GSHART1T00002808001	LmjF13.0420	Tbg972.11.5130	Tc00.1047053504089.40	Long-chain-fatty acid-CoA ligase protein
GSEM1T00007225001	GSHART1T00000476001	LmjF22.0250	none	none	Protein-tyrosine/serine phosphatase
GSEM1T00007481001	GSHART1T00005003001	LmjF35.1830	Tbg972.9.9330	Tc00.1047053510765.10	putative uncharacterized protein
GSEM1T00007577001	Hit in synteny on scaffold_6:410798-411259 (gene missed in the annotation)	LmjF35.2740*	Tbg972.5.60	Tc00.1047053507009.40	Galactokinase
GSEM1T00007640001	GSHART1T00006773001	LmjF35.3350	Tbg972.9.7340	Tc00.1047053507011.260	contains Tetrapyrrole methylase domain
GSEM1T00007687001	GSHART1T00006818001	LmjF09.0360	Tbg972.11.13790	Tc00.1047053511127.260	DNA photolyase
GSEM1T00007847001	GSHART1T00005555001	LmjF28.1970*	Tbg972.11.10030	Tc00.1047053509199.24	Ribose 5-phosphate isomerase
GSEM1T00007903001	GSHART1T00005613001	LmjF28.1380	Tbg972.11.8420	Tc00.1047053506779.170	Haloacid dehalogenase-like hydrolase (HAD)
GSEM1T00008001001	GSHART1T00005717001	LmjF28.0380	none	Tc00.1047053506163.50	Saccharopine dehydrogenase
GSEM1T00008113001	GSHART1T00000208001	LmjF26.1210	Tbg972.11.6040	none	Aldo/keto reductase
GSEM1T00008205001	GSHART1T00000099001	LmjF24.1440	Tbg972.8.7010	Tc00.1047053506205.30	contains Pyruvate/Phosphoenolpyruvate kinase, HpcH/HpaI aldolase domains
GSEM1T00008270001	GSHART1T00000025001	LmjF24.2110	Tbg972.8.6150	Tc00.1047053511071.50	contains Thiolase-like domain
No hits on genome nor reads (but gap in the syntenic region: either not in EM1 or not assembled)	GSHART1T00000229001	LmjF24.0460	Tbg972.11.5840	none	Ubiquitin activating enzyme
Hit in synteny on scaffold_1:861242-861466 (region containing gaps: gene not completely assembled)	GSHART1T00003199001	LmjF34.3250*	none	none	Putative indolepyruvate decarboxylase
Hit on reads (not on the genome), gap in the syntenic region (gene not assembled)	GSHART1T00003878001	LmjF22.0590	Tbg972.7.2810	Tc00.1047053506857.110	Uncharacterised protein family UPF0066
Hit in synteny on scaffold_7:434469-435767 (gene missed in the annotation)	GSHART1T00006795001	LmjF09.0590	Tbg972.11.14060	Tc00.1047053508777.90	ATP-dependent DNA helicase
