# Supplementary material for: The Streamlined Genome of Phytomonas spp. Relative to Human Pathogenic Kinetoplastids Reveals a Parasite Tailored for Plants
Source: PLoS Genet. 2014 Feb 6;10(2):e1004007. doi: 10.1371/journal.pgen.1004007 (PMC3916237; doi:10.1371/journal.pgen.1004007)
Supplement: Table S5 — Phytomonas EM1 and HART1 tRNA genes. tRNA genes were predicted in both Phytomonas isolates using tRNA-Scan. Green highlight indicates tRNA genes unique to Phytomonas. Yellow highlight indicates tRNA genes absent from all kinetoplastids. Orange highlight indicates tRNA genes found in other kinetoplastids but absent from Phytomonas. (XLS) [file pgen.1004007.s028.xls]

## Sheet: Sheet1
AA	Codon	Anticodon	EM1	HART1	L. major	T. brucei	T. cruzi
		(DNA)	scaffold	scaffold	#	#	#
Ala	GCT	AGC			2	2	2
	GCC	GGC			0	0	0
	GCA	TGC	12	1	1	1	2
	GCG	CGC	2, 17	3, 17	2	2	2
Arg	CGT	ACG	4, 15, 17	4, 5	4	3	4
	CGC	GCG			0	0	0
	CGA	TCG	45	4	1	1	2
	CGG	CCG	28	1	1	1	2
	AGA	TCT	12	1	1	1	2
	AGG	CCT	12	1	1	1	2
Asn	AAT	ATT		1	0	0	0
	AAC	GTT	3, 15, 61	11	3	2	4
Asp	GAC	GTC			3	2	2
	GAT	ATC			0	0	0
Cys	TGT	ACA			0	0	0
	TGC	GCA	13	7	1	2	2
Gln	CAA	TTG	17	4	1	1	2
	CAG	CTG	9, 9	1, 1	3	2	4
Glu	GAA	TTC	28, 28	1, 1	1	1	1
	GAG	CTC	11, 12	1, 8	2	2	4
Gly	GGT	ACC			0	0	0
	GGC	GCC	15		4	3	4
	GGA	TCC	17	4	1	1	2
	GGG	CCC	2	3	1	1	2
His	CAT	ATG			0	0	0
	CAC	GTG	26, 28	1, 1	2	1	4
Ile	ATT	AAT	2, 2, 9	1, 1, 1	3	2	4
	ATC	GAT			0	0	0
	ATA	TAT	45	4	1	1	2
Leu	TTA	TAA	9	1	1	1	2
	TTG	CAA	1	2	1	1	2
	CTT	AAG	2, 15	4, 7	3	1	4
	CTC	GAG			0	0	0
	CTA	TAG	2	1	1	1	2
	CTG	CAG	12, 61	8, 27	2	1	2
Lys	AAA	TTT	45	4	1	1	2
	AAG	CTT	12, 19, 45	1, 4, 6	3	3	4
Met	ATG	CAT	2, 13, 15	1, 4, 7	4	3	6
Phe	TTT	AAA			0	0	0
	TTC	GAA	91		2	2	4
Pro	CCT	AGG	1	2	2	1	2
	CCC	GGG			0	0	0
	CCA	TGG	13	7	1	1	2
	CCG	CGG	2, 9	1	2	1	2
Ser	TCT	AGA	91	77	1	1	2
	TCC	GGA	1		0	0	0
	TCA	TGA	2	1	1	1	2
	TCG	CGA		2	1	1	2
	AGT	ACT			0	0	0
	AGC	GCT			2	2	2
Thr	ACT	AGT	1, 1, 1		3	1	2
	ACC	GGT			0	0	0
	ACA	TGT	45	4	1	1	2
	ACG	CGT	2	1	2	1	2
Trp	TGG	CCA	17	4	1	1	2
Tyr	TAT	ATA			0	0	0
	TAC	GTA	1, 1		3	1	2
Val	GTT	AAC	2, 11	1, 8	2	2	2
	GTC	GAC			0	0	0
	GTA	TAC	45	4	1	1	2
	GTG	CAC	28, 28	1, 1	2	1	1
Sec	TGA	TCA			1	2	8
Sup	TAG	CTA	6
Total			(65), 1	-55	83	66	120
Pseudo	CCG (P)	CGG		1
